# Supplementary material for: The associations of sitting time and physical activity on total and site-specific cancer incidence: Results from the HUNT study, Norway
Source: PubMed Central journal article supplement (PMC6198967; doi:10.1371/journal.pone.0206015), 2018-10-23
Supplement: pone.0206015.s001.pdf [file pone.0206015.s001.pdf]

## Supporting information

**S1 Table. Joint associations of sitting and PA with total cancer - crude estimates in men (n=18 771)**

| MET-h/week          | Sitting time (h/day)     |                          |
|---------------------|--------------------------|--------------------------|
|                     | Low <8                   | High ≥8                  |
| Low (≤8.3)          | <b>1.07 (0.96, 1.20)</b> | <b>1.16 (1.02, 1.34)</b> |
| Moderate (8.4-16.3) | <b>1.02 (0.90, 1.16)</b> | <b>1.10 (0.92, 1.31)</b> |
| High (>16.3)        | <b>1.00 (ref)</b>        | <b>1.02 (0.86, 1.22)</b> |

adjusted for sex and age
