# Supplementary material for: The associations of sitting time and physical activity on total and site-specific cancer incidence: Results from the HUNT study, Norway
Source: PubMed Central journal article supplement (PMC6198967; doi:10.1371/journal.pone.0206015), 2018-10-23
Supplement: pone.0206015.s002.pdf [file pone.0206015.s002.pdf]

## Supporting information

**S2 Table. Joint associations of sitting and PA with colorectal cancer – adjusted estimates in women (n=19 149)**

| MET-h/week          | Sitting time (h/day)     |                          |
|---------------------|--------------------------|--------------------------|
|                     | Low <8                   | High ≥8                  |
| Low (≤8.3)          | <b>1.04 (0.49, 1.48)</b> | <b>0.85 (0.49, 1.48)</b> |
| Moderate (8.4-16.3) | <b>1.20 (0.76, 1.91)</b> | <b>1.19 (0.62, 2.29)</b> |
| High (>16.3)        | <b>1.00 (ref)</b>        | <b>2.12 (1.10, 4.08)</b> |

Age, sex, education, smoking, alcohol, BMI
